# Supplementary material for: Phytochemical Characterization, and Antioxidant and Antimicrobial Properties of Agitated Cultures of Three Rue Species: Ruta chalepensis, Ruta corsica, and Ruta graveolens
Source: MDPI journal article supplement (doi:10.3390/antiox11030592), 2022-03-20
Supplement: s1 [file s1]

Phytochemical characterization, and antioxidant and antimicrobial properties of agitated cultures of three rue species: *Ruta chalepensis*, *Ruta corsica* and *Ruta graveolens*.

## Supplementary files

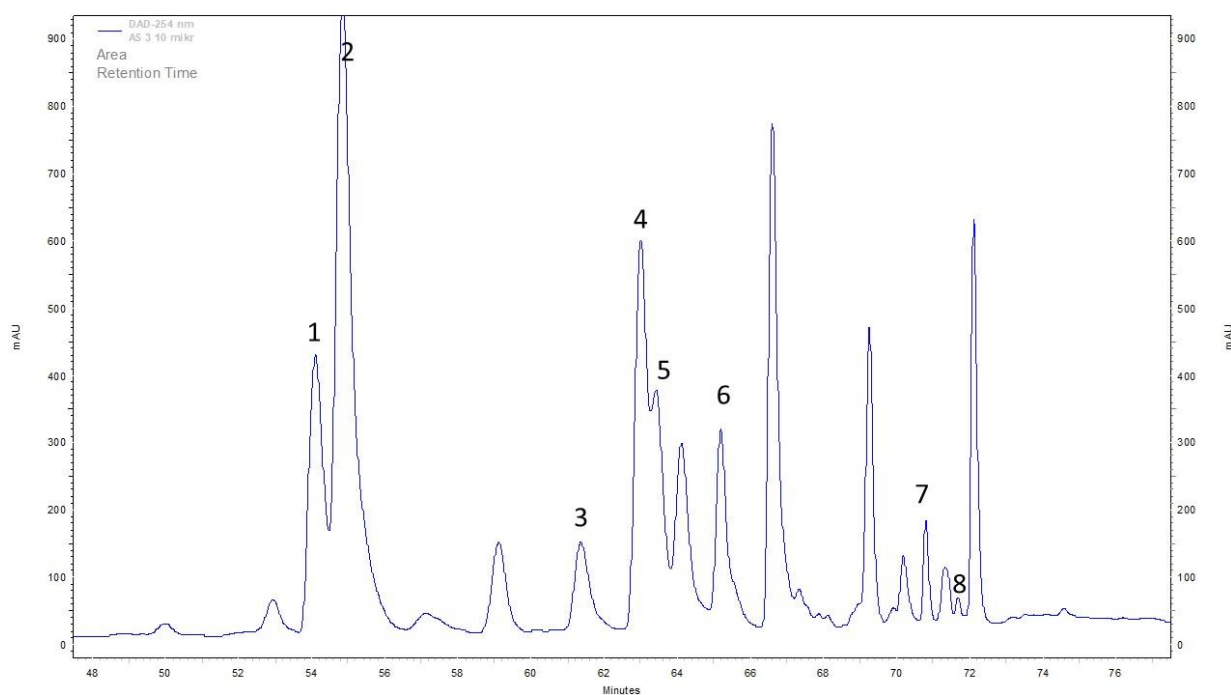

**Figure S1** Sample chromatogram of the extract from *Ruta corsica* *in vitro* cultures (1. psoralen, 2. xanthotoxin, 3. isopimpinellin, 4. skimmianine, 5. bergapten, 6.  $\gamma$ -fagarine, 7. 7-isopentenyl-oxy- $\gamma$ -fagarine, 8. isoimperatorin)

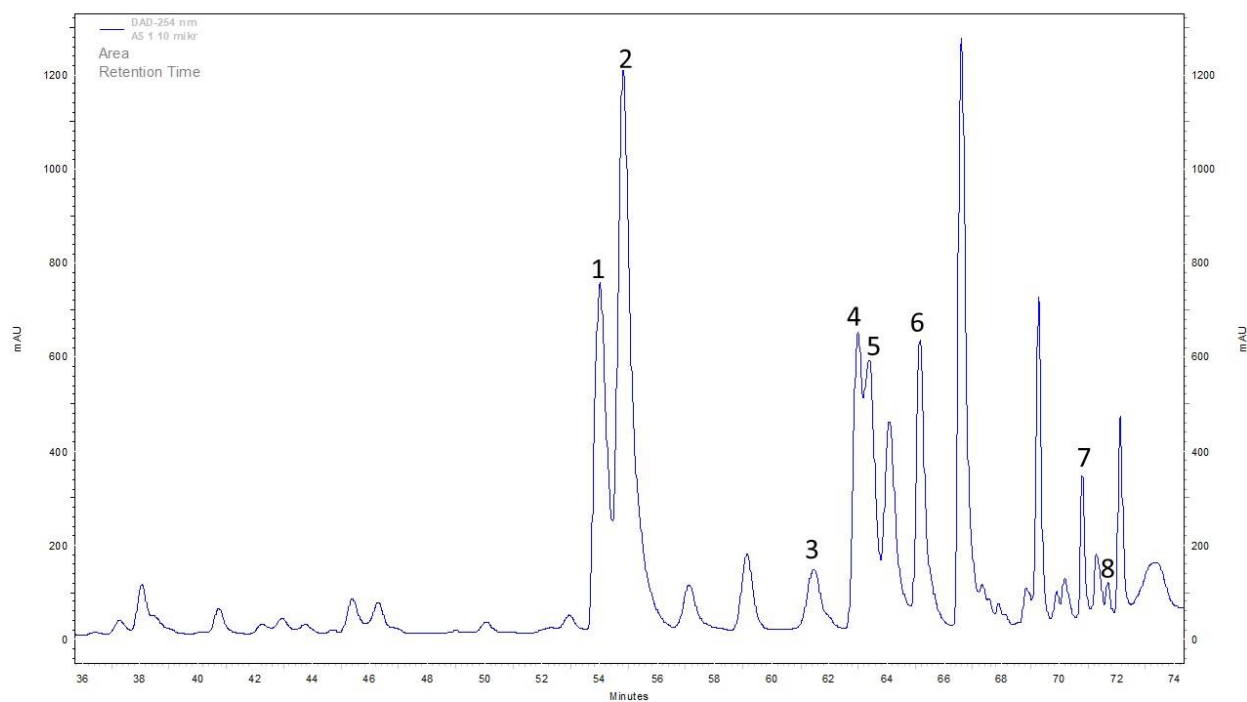

**Figure S2** Sample chromatogram of the extract from *Ruta chalepensis* *in vitro* cultures. (1. psoralen, 2. xanthotoxin, 3. isopimpinellin, 4. skimmianine, 5. bergapten, 6.  $\gamma$ -fagarine, 7. 7-isopentenylxy- $\gamma$ -fagarine, 8. isoimperatorin)

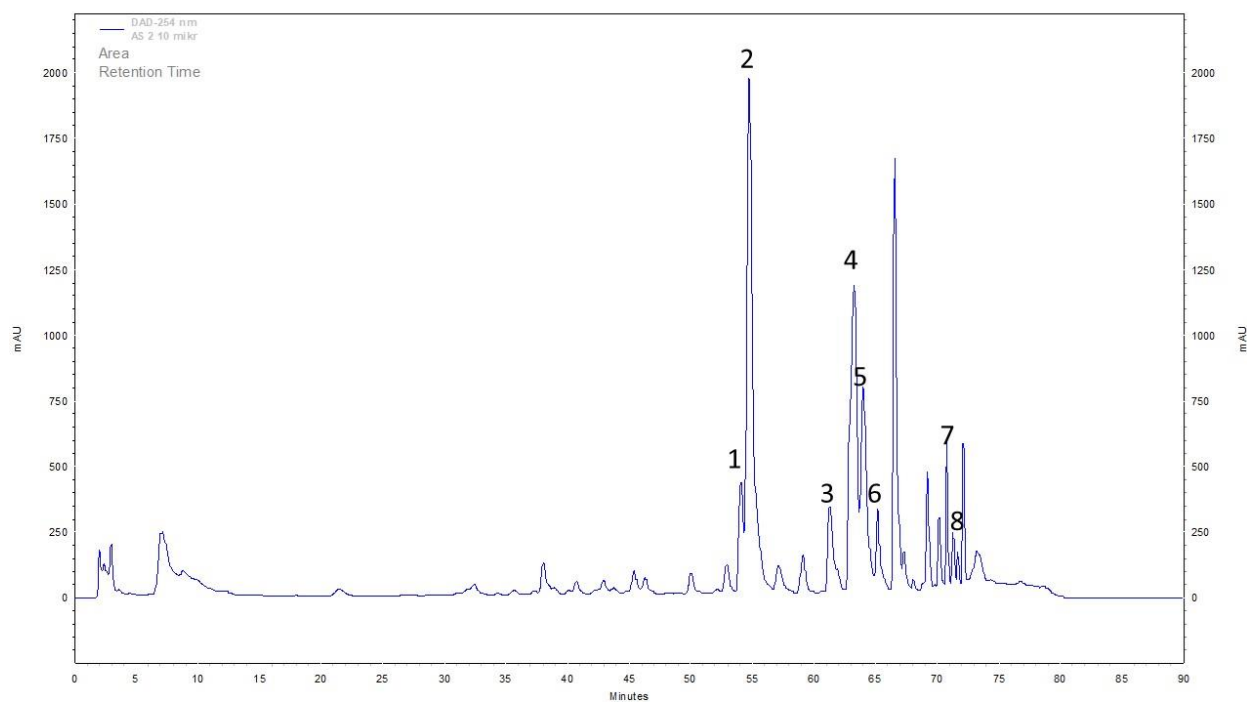

**Figure S3** Sample chromatogram of the extract from *Ruta graveolens* *in vitro* cultures. (1. psoralen, 2. xanthotoxin, 3. isopimpinellin, 4. skimmianine, 5. bergapten, 6.  $\gamma$ -fagarine, 7. 7-isopentenyl-oxy- $\gamma$ -fagarine, 8. isoimperatorin)
